# Supplementary material for: Block Copolymer Membranes from Polystyrene-b-poly(solketal methacrylate) (PS-b-PSMA) and Amphiphilic Polystyrene-b-poly(glyceryl methacrylate) (PS-b-PGMA)
Source: Polymers (Basel). 2017 Jun 10;9(6):216. doi: 10.3390/polym9060216 (PMC6432498; doi:10.3390/polym9060216)
Supplement: Supplementary file 1 [file polymers-09-00216-s001.pdf]

# Supplementary Materials: Block Copolymer Membranes from Polystyrene-*b*-poly(solketal methacrylate) (PS-*b*-PSMA) and Amphiphilic Polystyrene-*b*-poly(glyceryl methacrylate) (PS-*b*-PGMA)

Sarah Saleem, Sofia Rangou, Clarissa Abetz, Brigitte Lademann, Volkan Filiz and Volker Abetz

Due to difference in solubility behaviour of polystyrene-*b*-poly(solketal methacrylate) (PS-*b*-PSMA) and polystyrene-*b*-poly(glyceryl methacrylate) (PS-*b*-PGMA), the hydroxyl groups of the polymers PS-*b*-PGMA were protected with *tert*-butyldimethylsilyl chloride in the presence of DMF and imidazole at room temperature. Following is the detailed characterization with GPC and <sup>1</sup>H-NMR.

## Reaction Scheme:

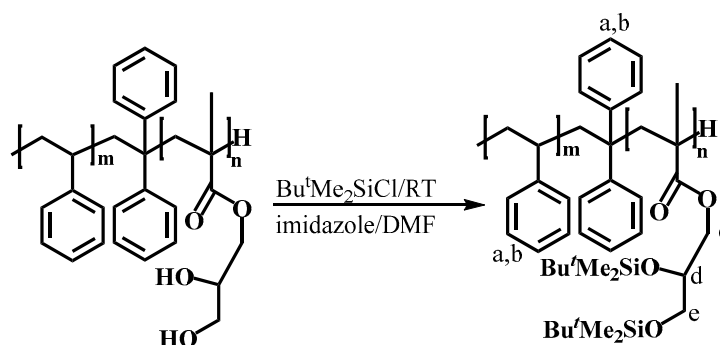

**Figure S1.** Route of synthesis of PS-*b*-(Bu<sup>t</sup>Me<sub>2</sub>Si-PGMA).

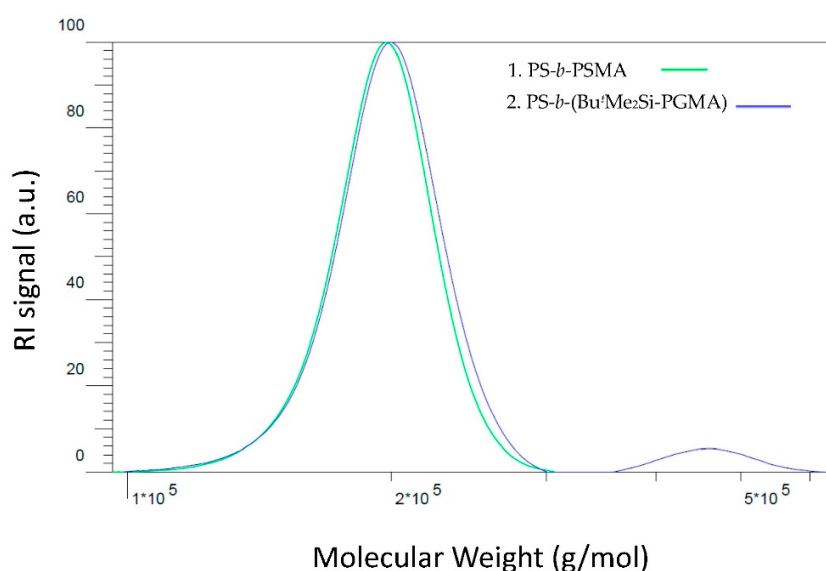

**Figure S2.** GPC traces (measurement in THF at 30°C using PS standards): (1) PS-*b*-PSMA; (2) PS-*b*-(Bu<sup>t</sup>Me<sub>2</sub>Si-PGMA).

**Table S1.** Characterization of PS-*b*-PSMA and PS- *b*-(Bu<sup>t</sup>Me<sub>2</sub>Si-PGMA) diblock copolymers.

| Polymers *                                                                           | Mn (kg/mol) ** | Mn (kg/mol) *** | PDI  |
|--------------------------------------------------------------------------------------|----------------|-----------------|------|
| PS <sub>83</sub> - <i>b</i> -PSMA <sub>17</sub>                                      | 176            | 191             | 1.02 |
| **** PS <sub>87</sub> - <i>b</i> -PGMA <sub>13</sub>                                 | 167            | -               | -    |
| PS <sub>84</sub> - <i>b</i> -(Bu <sup>t</sup> Me <sub>2</sub> Si-PGMA) <sub>16</sub> | 174            | 199             | 1.05 |

\* lower case numbers indicate weight fraction (%) of the blocks; \*\*molecular weights from <sup>1</sup>H-NMR based on PS-precursor molecular weight from GPC; \*\*\*apparent GPC molecular weights; \*\*\*\* Insoluble polymer in THF, for this reason molecular weight is calculated by PS precursor (measurement in THF at 30°C) in combination with weight percentages derived from <sup>1</sup>H-NMR in DMF *d*<sub>7</sub>, assuming 100% conversion.

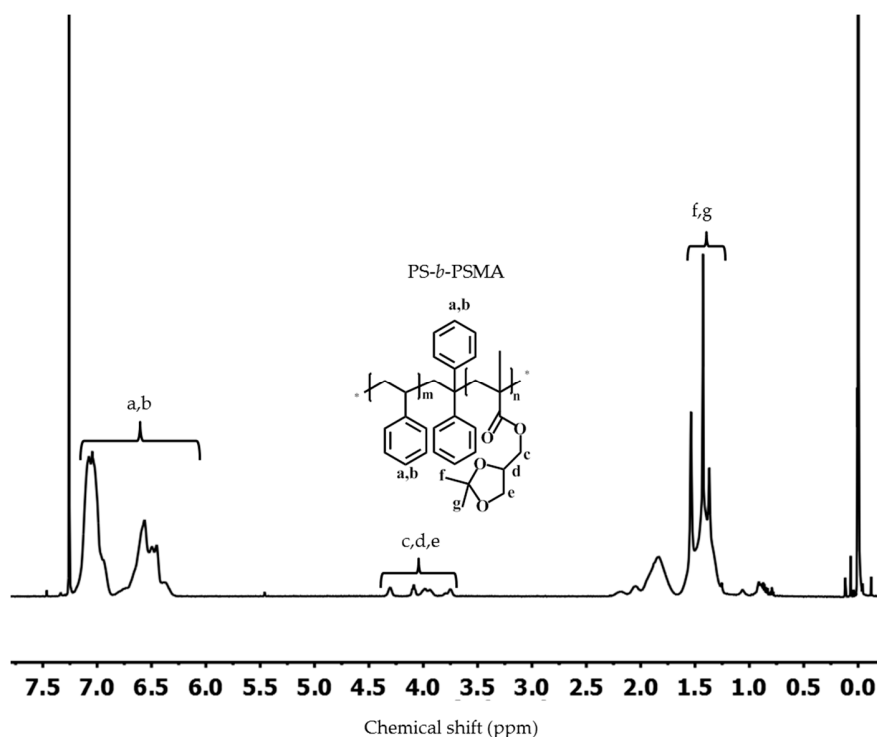**Figure 3.** <sup>1</sup>H-NMR spectra of PS-*b*-PSMA in CDCl<sub>3</sub>.

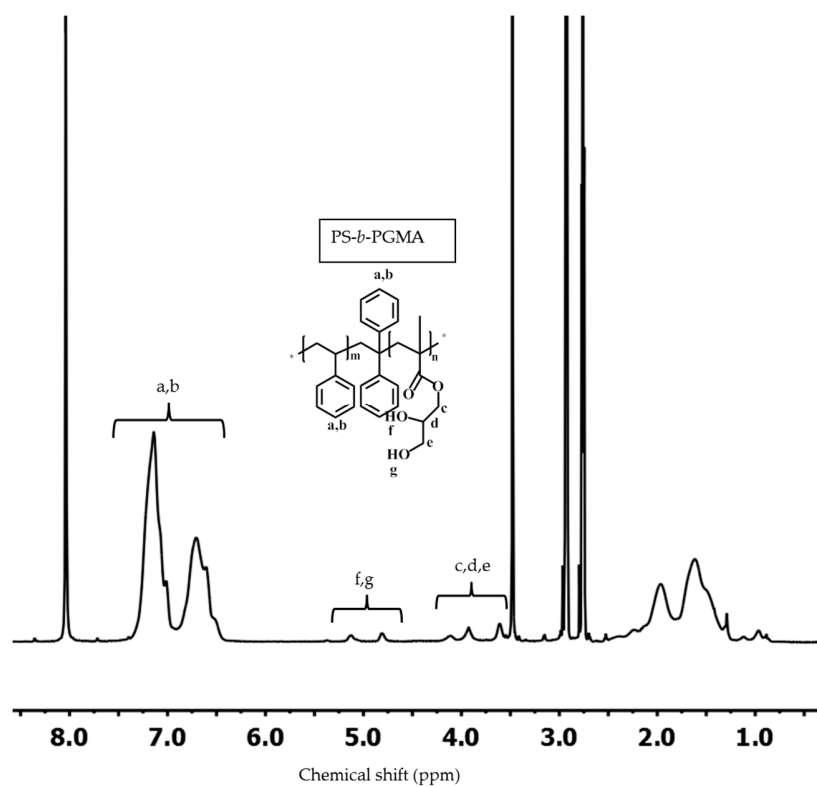

Figure S4.  $^1\text{H}$ -NMR spectra of PS-*b*-PGMA in  $\text{DMF-}d_7$ .

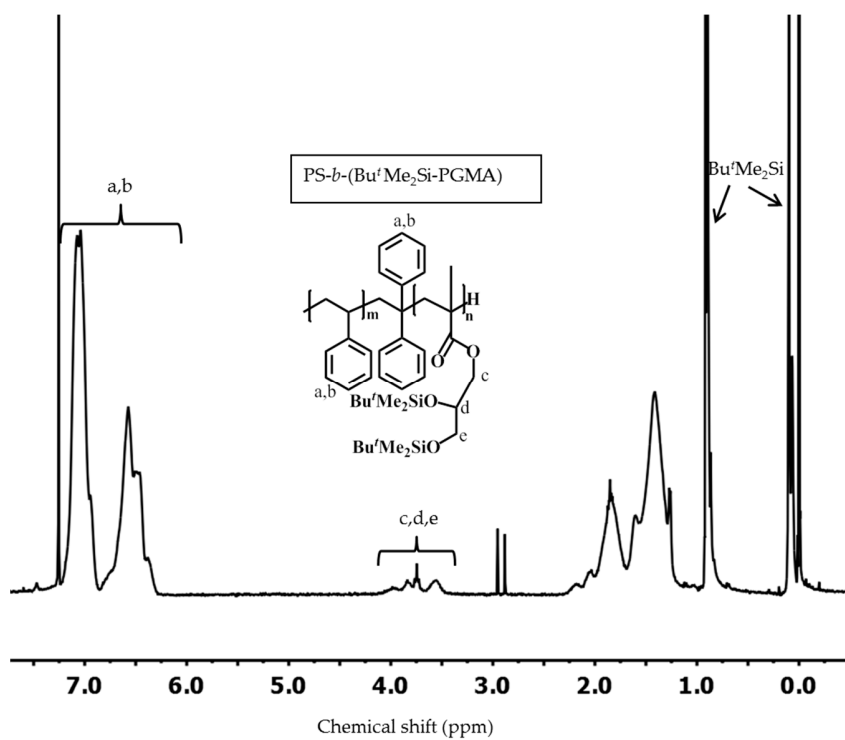

Figure S5.  $^1\text{H}$ -NMR spectra of PS-*b*-( $\text{Bu}^t\text{Me}_2\text{Si-PGMA}$ ) in  $\text{CDCl}_3$ .
